# Supplementary material for: Lonimacranaldes A–C, three iridoids with novel skeletons from Lonicera macranthoides
Source: Royal Society of Chemistry journal article supplement (doi:10.1039/c9ra04029c), 2019-01-01
Supplement: c9ra04029c1.pdf [file c9ra04029c1.pdf]

## Supporting Information

### Lonimacranalides A-C, Three Iridoids with Novel Skeleton from *Lonicera macranthoides*

Yu-Dan Mei,<sup>‡, a, b</sup> Hai-Bo Li,<sup>‡, c</sup> Qian-Qian Pang,<sup>a</sup> Ting Li,<sup>a</sup> Da-Bo Pan,<sup>a</sup> Yi Dai,<sup>a</sup> Da-Peng Qin,<sup>a</sup> He Meng,<sup>b</sup> Yang Yu,<sup>\*, a</sup> and  
Xin-Sheng Yao<sup>\*, a</sup>

<sup>a</sup> Institute of Traditional Chinese Medicine & Natural Products, College of Pharmacy, Jinan University, Guangzhou 510632, P. R. China. E-mail: [1018yuyang@163.com](mailto:1018yuyang@163.com); [tyaoxs@jnu.edu.cn](mailto:tyaoxs@jnu.edu.cn). Tel (Fax): +86-20-85221559

<sup>b</sup> Xiangxue Academician workstation, Xiangxue Pharmaceutical Co. Ltd. Guangzhou, 510663, P. R. China <sup>c</sup> Beijing Institute of Pharmacology and Toxicology, Tai Ping Road 27, Beijing 100850, P. R. China

<sup>c</sup> Jiangsu Kanion Pharmaceutical Co., Ltd. and State Key Laboratory of New-tech for Chinese Medicine Pharmaceutical Process, Jiangsu, Lianyungang, 222001, China

<sup>‡</sup>These authors have contributed equally to this work

Corresponding author: Tel (Fax): +86-20-85221559

E-mail: [1018yuyang@163.com](mailto:1018yuyang@163.com); [tyaoxs@jnu.edu.cn](mailto:tyaoxs@jnu.edu.cn)

<sup>#</sup>These authors contributed equally to this work.

## List of Supporting Information

|                                                                                               |    |
|-----------------------------------------------------------------------------------------------|----|
| 1. UPLC-Q-TOF-MS analysis.....                                                                | 3  |
| 2. Acid Hydrolysis and HPLC Analysis of Sugar .....                                           | 4  |
| 3. Single X-ray Diffraction Analysis and Crystallographic Data for Ionimacranalde A (1) ..... | 5  |
| 4. The NMR, HRESIMS, UV, IR, and CD spectra of 1-3 .....                                      | 7  |
| 4.1 Figure S4-S14. For Ionimacranalde A (1) .....                                             | 7  |
| 4.2 Figure S15-S25. For Ionimacranalde B (2) .....                                            | 12 |
| 4.3 Figure S26-S36. For Ionimacranalde C (3).....                                             | 17 |

## 1. UPLC-Q-TOF-MS analysis

**Preparation of sample solution:** The dried flower buds of *L. macranthoides* (50 g) were extracted using 70% MeOH by ultrasonic extraction at room temperature for 45 minutes. Then the extract was concentrated in vacuo and filtered for further UPLC-Q/TOF-MS analysis.

**Analysis conditions:** UPLC-Q/TOF-MS analysis was performed using Waters Acquity UPLC Synapt™ MS systems (Waters, Milford, USA) accompanied with a ACQUITY UPLC BEH C18 column (2.1 mm × 50 mm, 1.7 μm) at negative ion mode. A gradient program with the mobile phase (10% to 15% CH<sub>3</sub>OH at 0–3 min, 15% to 30% CH<sub>3</sub>OH at 3–7 min, 30% to 100% CH<sub>3</sub>OH at 7–10 min, 100% CH<sub>3</sub>OH at 10–11.5 min) was used as eluent at flow rate of 0.4 mL/min.

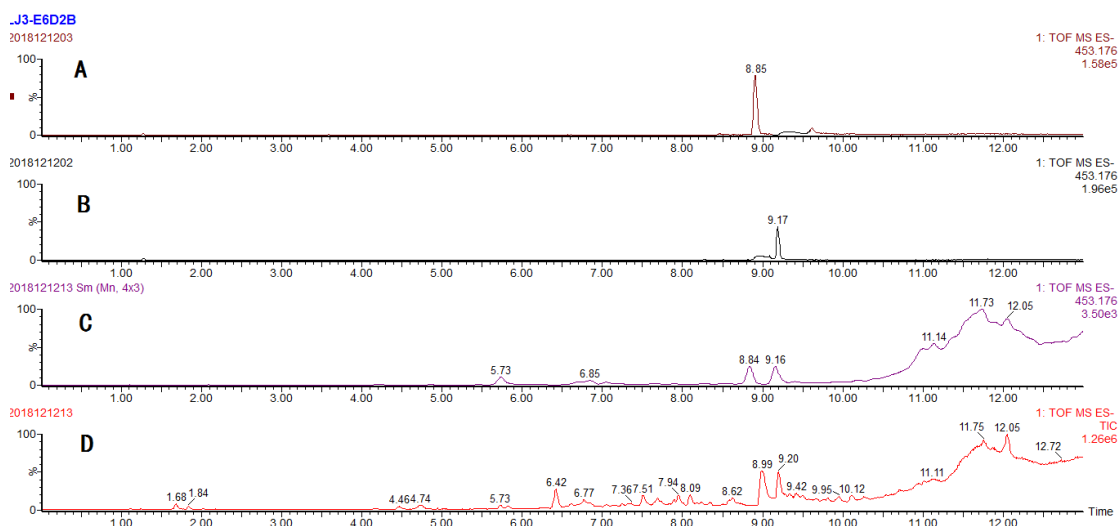

**Figure S1.** UPLC-QTOF/MS analysis of the 70% methanol extract of *L. macranthoides* (A: TIC of standard of compound **1**; B: TIC of standard of compound **2**; C: extracted ion chromatogram of ion 453.1761, Peak I: retention time: 8.84 min, m/z 453.1745 [M-H]<sup>-</sup>; Peak II: retention time 9.16 min, m/z 453.1761 [M-H]<sup>-</sup>; D: Total ion chromatogram;)

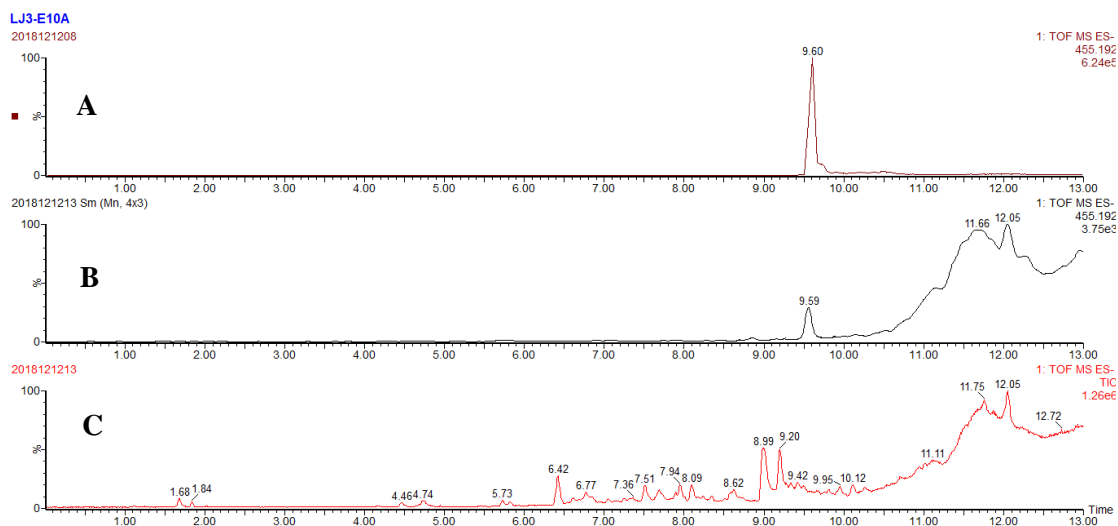

**Figure S2.** (A: TIC of standard of compound **3**; B: extracted ion chromatogram of ion 455.1917, Peak III: retention time: 9.59 min,  $m/z$  455.1918  $[M-H]^-$  ; C: Total ion chromatogram;)

## 2. Acid Hydrolysis and HPLC Analysis of Sugar

The absolute configuration of the sugar moieties was determined according to the reported method. Compounds **1** (1.5 mg) was hydrolyzed with HCl (2 mL, 2M) for 2 h at 90 °C. After extracting with EtOAc, the H<sub>2</sub>O layer was evaporated in vacuum to furnish a monosaccharide residue. The residue was dissolved in pyridine (1.0 mL) containing L-cysteine methyl ester hydrochloride (2.5 mg) and heated at 60 °C. One hour later, *o*-tolyl isothiocyanate (10 μL) was added and further reacted at 60 °C for 1 h. Then, the reaction mixture was directly analyzed by the HPLC system and detected with a UV detector at the wavelength of 250 nm on a C18 column at 35 °C. The mobile phase was CH<sub>3</sub>CN–H<sub>2</sub>O–HCOOH (25:75:0.1, v/v/v) at a flow rate of 0.8 mL/min. The standard monosaccharides, namely D-glucose, and L-glucose, were subjected to the same method. As a result, the sugar moiety of **1** was determined to be D-glucose by comparing retention time with glycosyl derivatization in HPLC chromatograph (**Figure S3**).

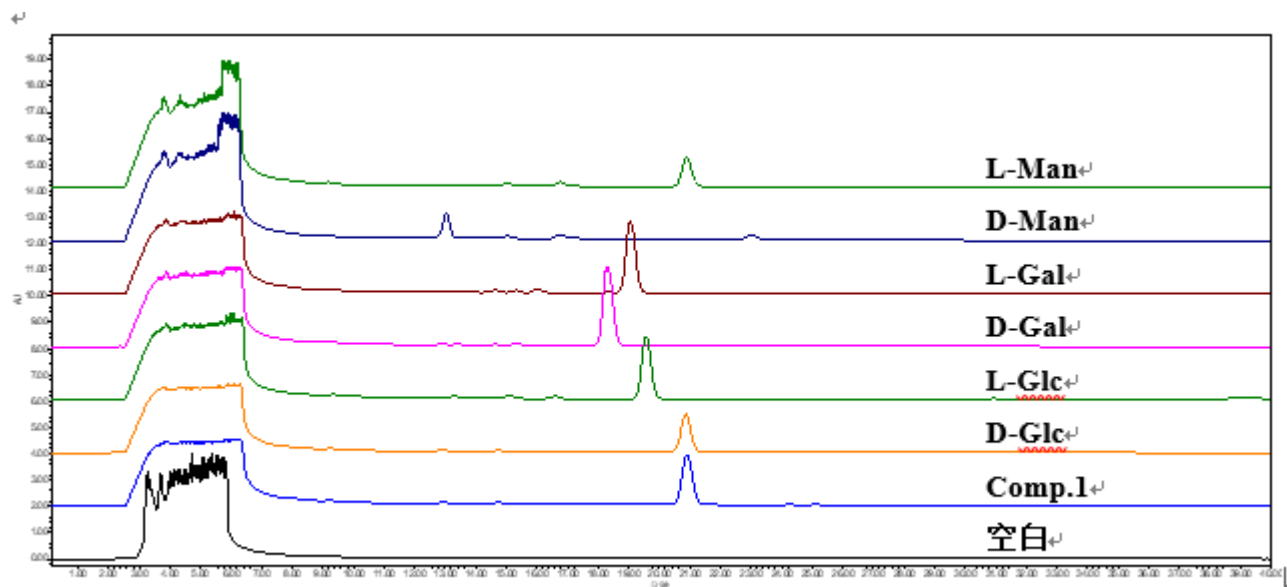

Figure S3. HPLC chromatograph for the derivatives of compound 1 and monosaccharides (250 nm)

### 3. Single X-ray Diffraction Analysis and Crystallographic Data for Ionimacranalde A (1)

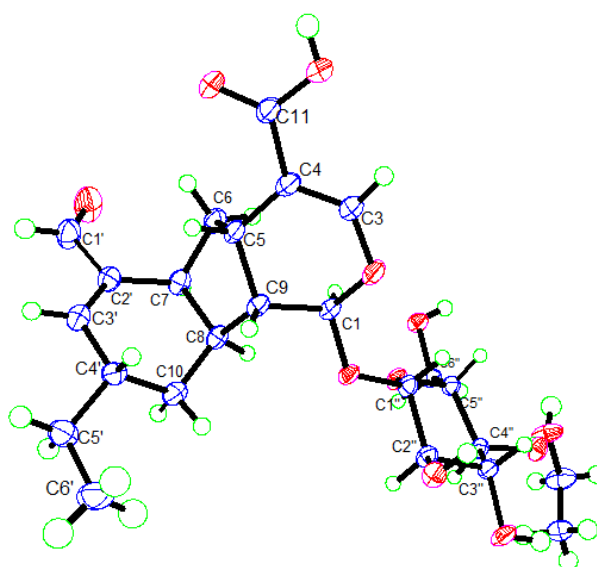

Crystallographic data for **1** have been deposited with the Cambridge Crystallographic Data Centre as supplementary publication no. CCDC 1877498. Copies of the data can be obtained, free of charge, on application to the Director, CCDC, 12 Union Road, Cambridge CB2 IEZ, UK (fax: +44-(0)1223-336033 or email: [deposit@ccdc.cam.ac.uk](mailto:deposit@ccdc.cam.ac.uk)).

Table S1 Crystal data and structure refinement for **1**

|                     |                                                                                   |
|---------------------|-----------------------------------------------------------------------------------|
| Identification code | E6D2A                                                                             |
| Empirical formula   | C <sub>22</sub> H <sub>30</sub> O <sub>10</sub> , C <sub>2</sub> H <sub>6</sub> O |

|                                             |                                                               |
|---------------------------------------------|---------------------------------------------------------------|
| Formula weight                              | 500.53                                                        |
| Temperature/K                               | 149.94(10)                                                    |
| Crystal system                              | monoclinic                                                    |
| Space group                                 | P2 <sub>1</sub>                                               |
| a/Å                                         | 13.1270(2)                                                    |
| b/Å                                         | 7.98020(10)                                                   |
| c/Å                                         | 13.2754(2)                                                    |
| α/°                                         | 90                                                            |
| β/°                                         | 116.561(2)                                                    |
| γ/°                                         | 90                                                            |
| Volume/Å <sup>3</sup>                       | 1243.90(4)                                                    |
| Z                                           | 2                                                             |
| ρ <sub>calc</sub> /cm <sup>3</sup>          | 1.336                                                         |
| μ/mm <sup>-1</sup>                          | 0.888                                                         |
| F(000)                                      | 536.0                                                         |
| Crystal size/mm <sup>3</sup>                | 0.15 × 0.12 × 0.1                                             |
| Radiation                                   | CuKα (λ = 1.54184)                                            |
| 2θ range for data collection/°              | 7.444 to 148.328                                              |
| Index ranges                                | -15 ≤ h ≤ 16, -9 ≤ k ≤ 9, -16 ≤ l ≤ 16                        |
| Reflections collected                       | 23017                                                         |
| Independent reflections                     | 4915 [R <sub>int</sub> = 0.0511, R <sub>sigma</sub> = 0.0275] |
| Data/restraints/parameters                  | 4915/1/327                                                    |
| Goodness-of-fit on F <sup>2</sup>           | 1.042                                                         |
| Final R indexes [I ≥ 2σ (I)]                | R <sub>1</sub> = 0.0360, wR <sub>2</sub> = 0.0889             |
| Final R indexes [all data]                  | R <sub>1</sub> = 0.0371, wR <sub>2</sub> = 0.0899             |
| Largest diff. peak/hole / e Å <sup>-3</sup> | 0.18/-0.30                                                    |
| Flack/Hooft parameter                       | -0.01(8)/0.00(5)                                              |

#### 4. The NMR, HRESIMS, UV, IR, and CD spectra of 1-3

##### 4.1 Figure S4-S14. For Ionimacranaldehyde A (1)

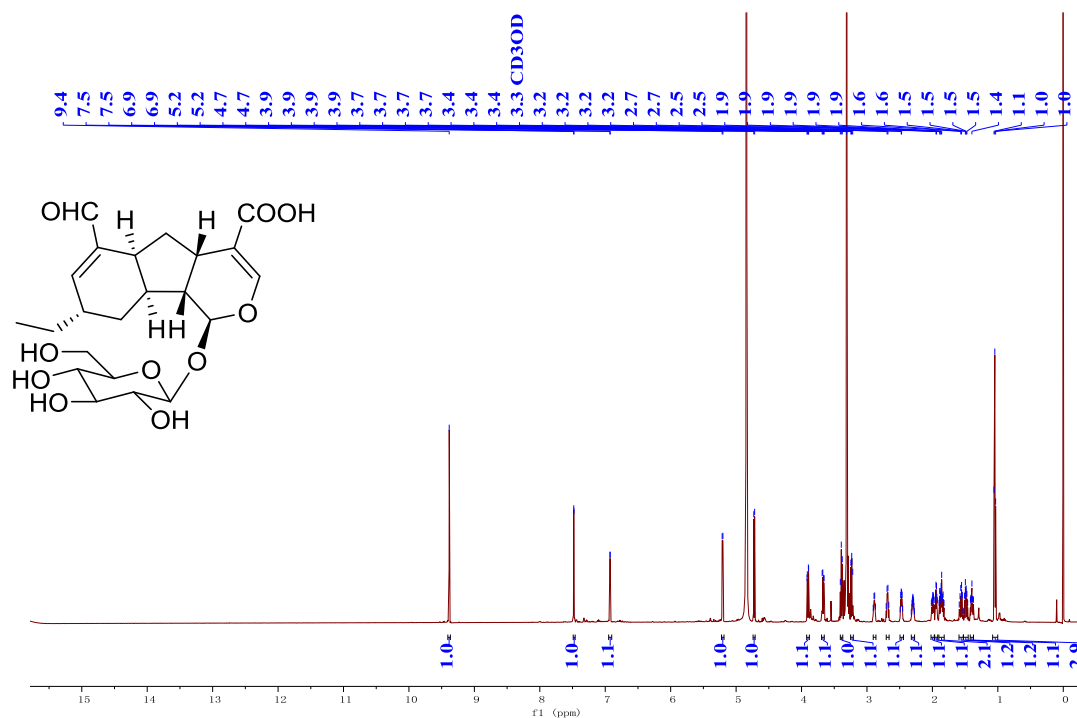

**Figure S4.**  $^1\text{H-NMR}$  spectrum of **1** (600 MHz, in  $\text{CD}_3\text{OD}$ )

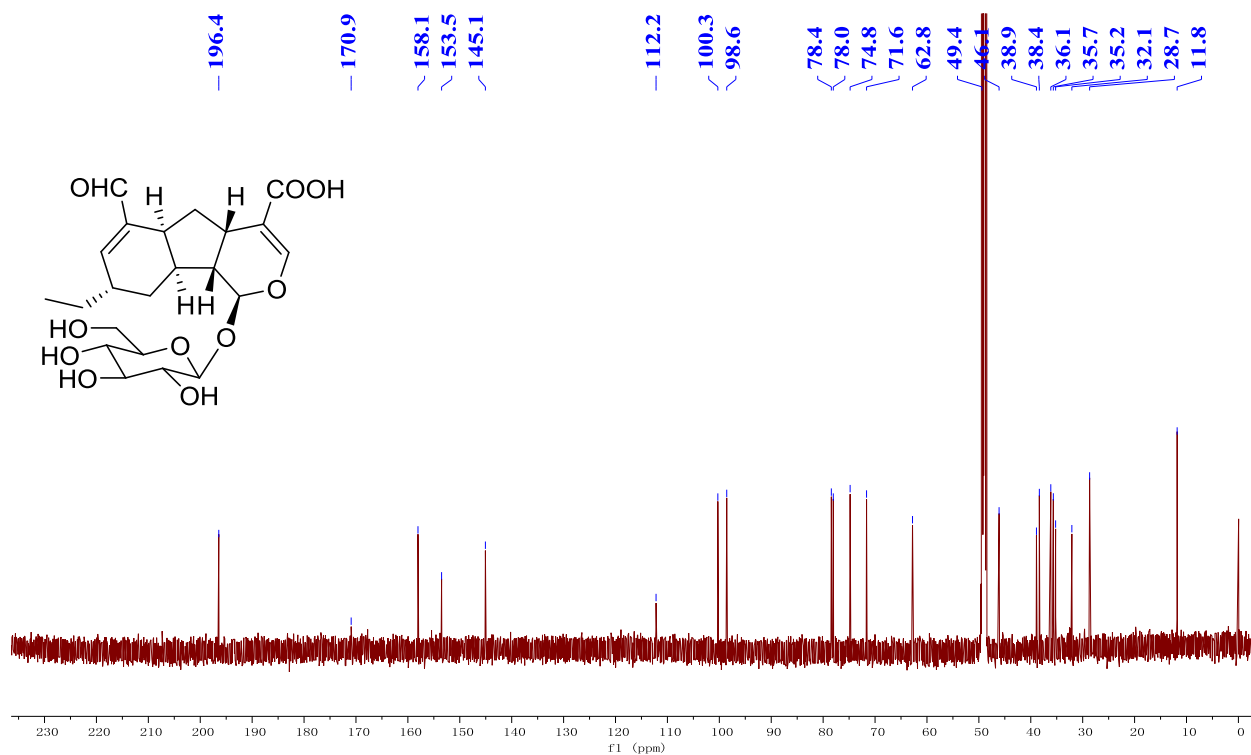

**Figure S5.**  $^{13}\text{C-NMR}$  spectrum of **1** (150 MHz, in  $\text{CD}_3\text{OD}$ )

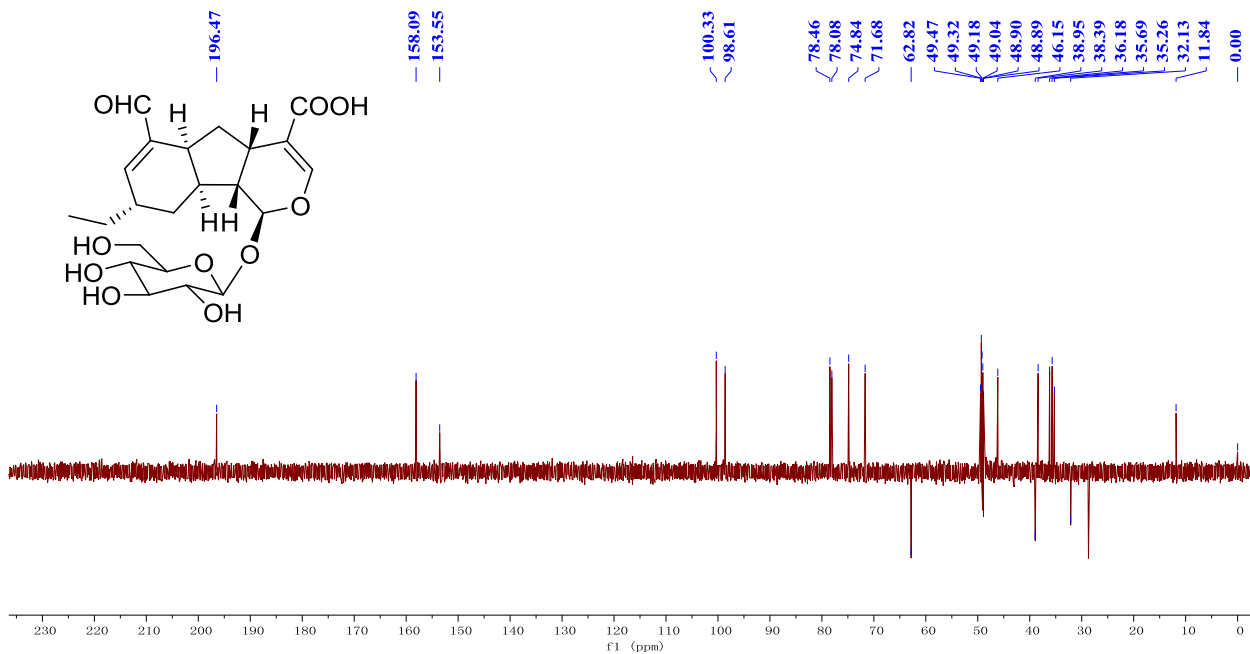

**Figure S6.** DEPT-135 spectrum of **1** (150 MHz, in CD<sub>3</sub>OD)

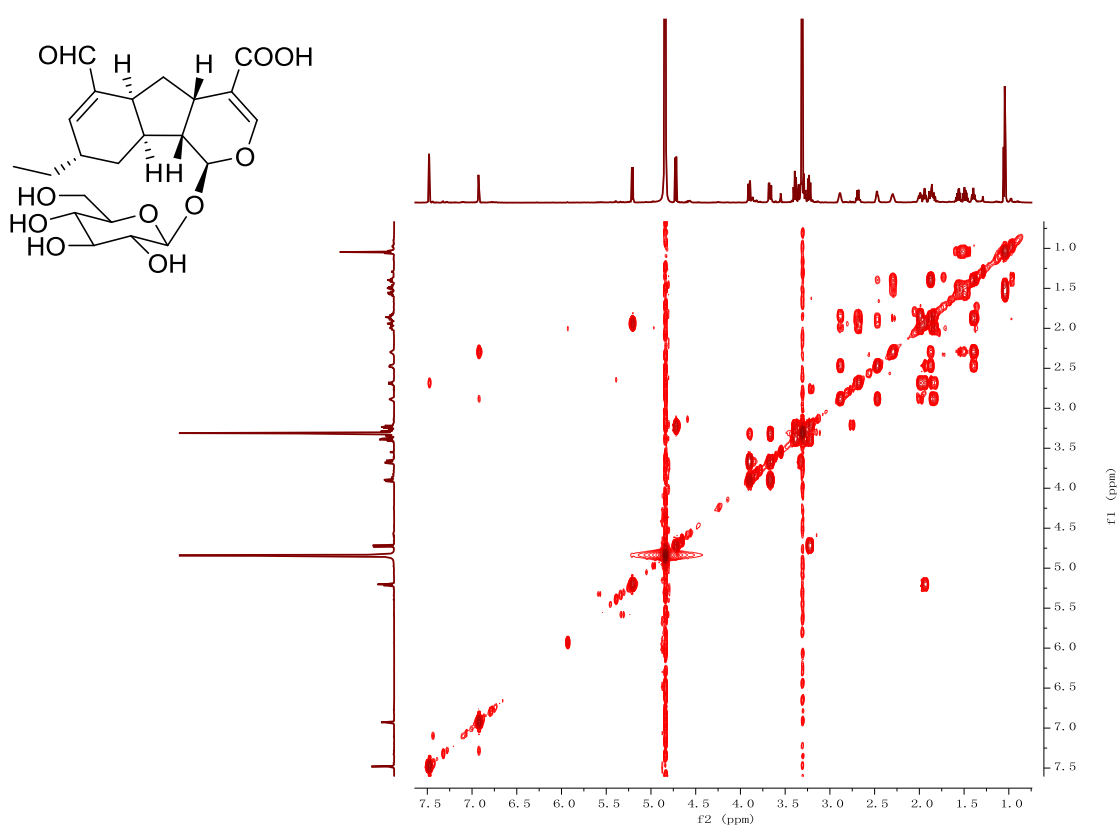

**Figure S7.** <sup>1</sup>H-<sup>1</sup>H COSY spectrum of **1** (in CD<sub>3</sub>OD)



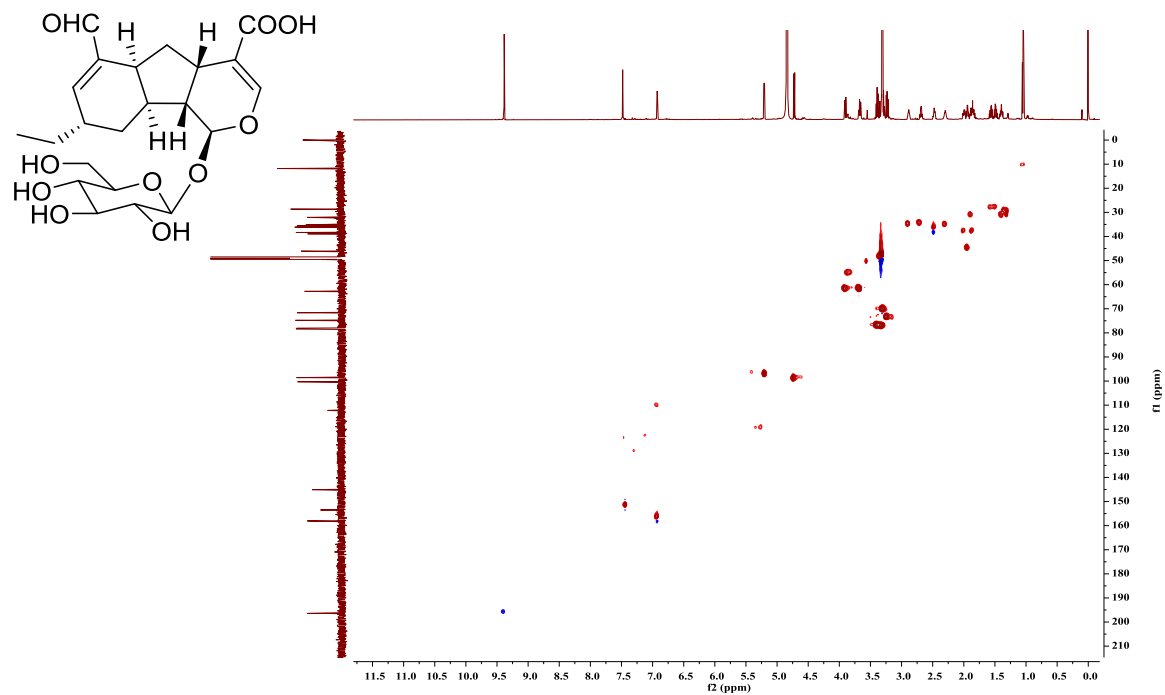

**Figure S8.** HSQC spectrum of **1** (in CD<sub>3</sub>OD)

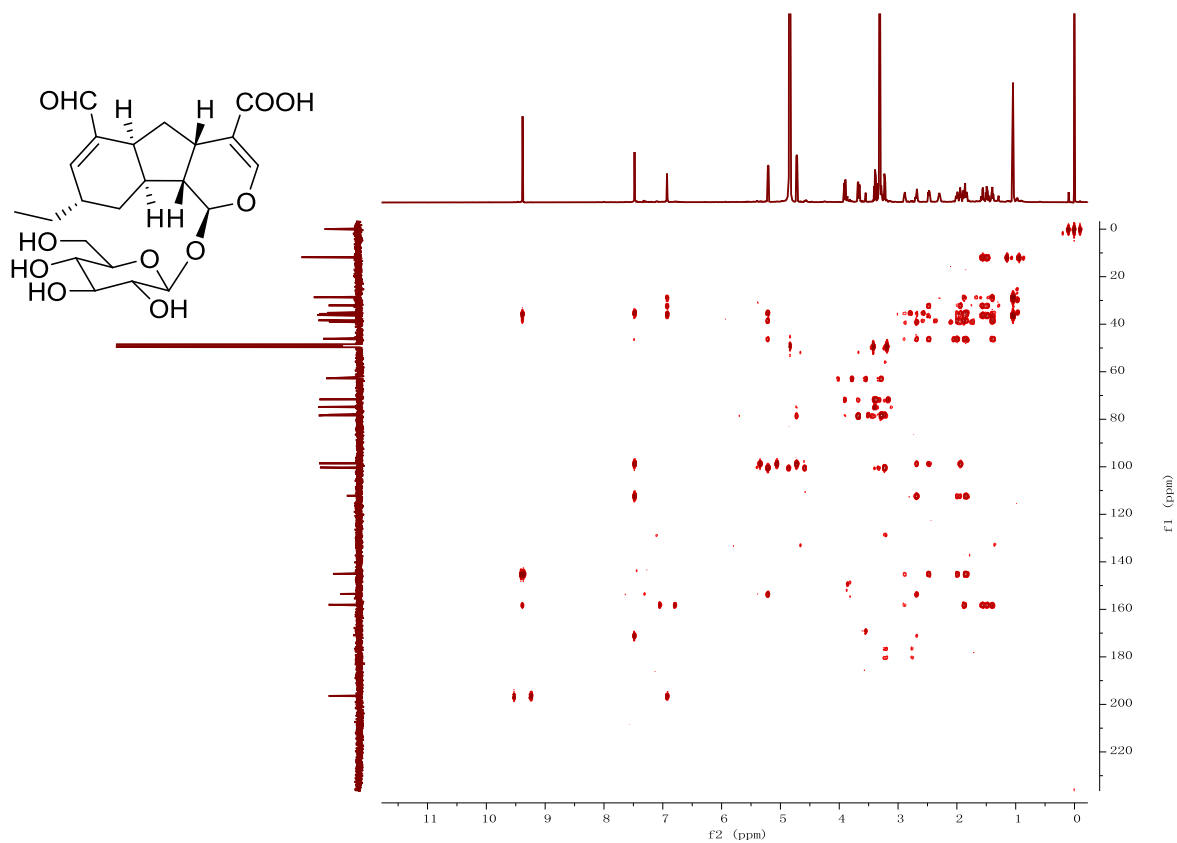

**Figure S9.** HMBC spectrum of **1** (in CD<sub>3</sub>OD)

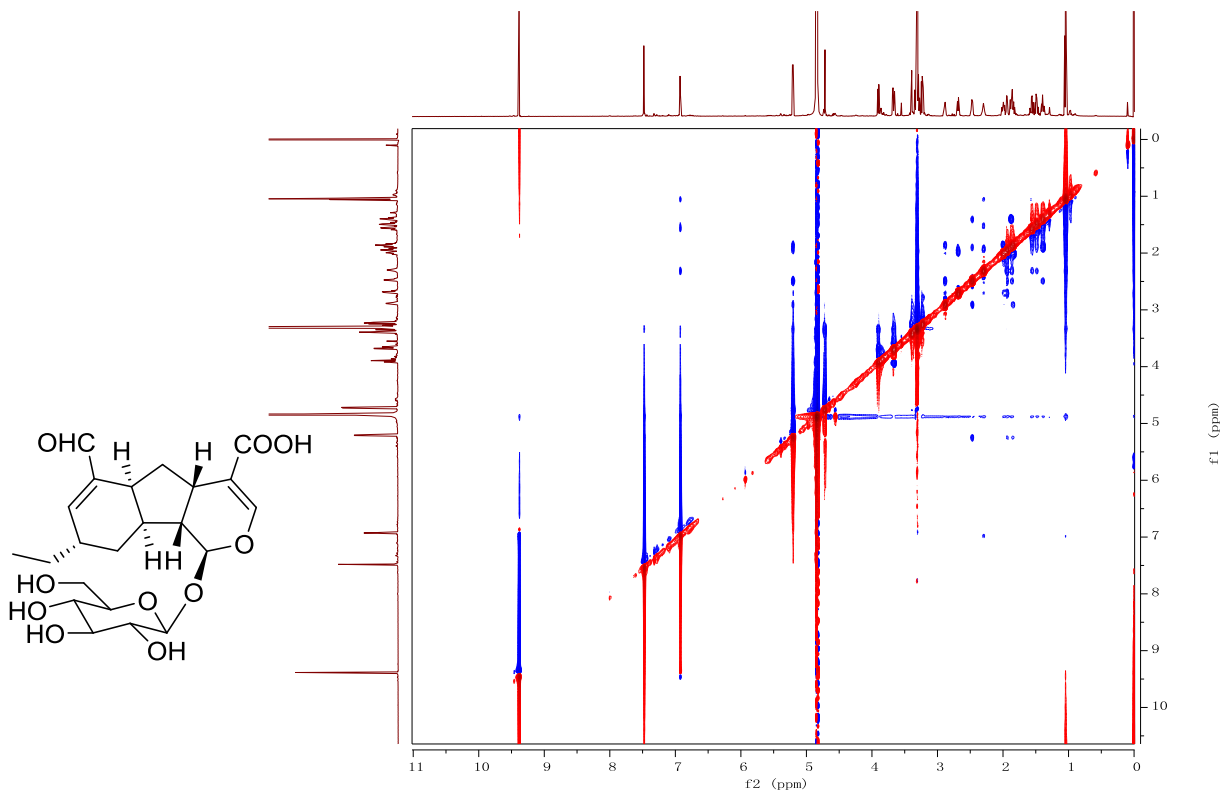

Figure S10. NOESY spectrum of **1** (in CD<sub>3</sub>OD)

Elemental Composition Report

Page 1

Single Mass Analysis

Tolerance = 5.0 mDa / DBE: min = -1.5, max = 50.0  
 Element prediction: Off  
 Number of isotope peaks used for i-FIT = 3

Monoisotopic Mass, Even Electron Ions  
 217 formula(e) evaluated with 4 results within limits (up to 20 best isotopic matches for each mass)  
 Elements Used:  
 C: 0-100 H: 0-200 O: 0-100 Na: 0-1  
 LJ3-E6D2A  
 2016041105 42 (0.348)

1: TOF MS ES+  
 2.87e+004

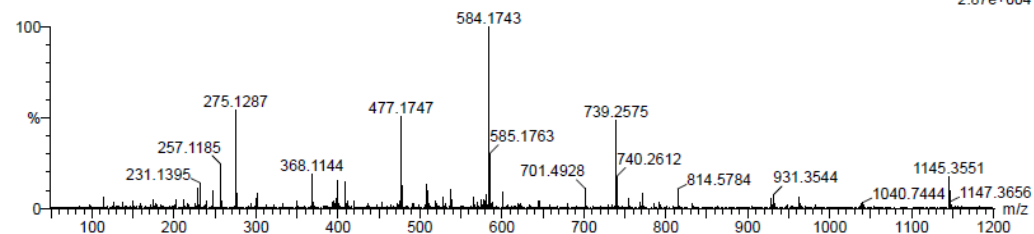

|          |            |      |       |      |       |       |          |                |  |
|----------|------------|------|-------|------|-------|-------|----------|----------------|--|
| Minimum: |            |      |       |      |       |       |          |                |  |
| Maximum: | 5.0        | 10.0 |       | -1.5 |       |       |          |                |  |
| Mass     | Calc. Mass | mDa  | PPM   | DBE  | i-FIT | Norm  | Conf (%) | Formula        |  |
| 477.1747 | 477.1737   | 1.0  | 2.1   | 7.5  | 208.5 | 0.063 | 93.88    | C22 H30 O10 Na |  |
|          | 477.1761   | -1.4 | -2.9  | 10.5 | 211.2 | 2.830 | 5.90     | C24 H29 O10    |  |
|          | 477.1795   | -4.8 | -10.1 | -1.5 | 215.1 | 6.750 | 0.12     | C15 H34 O15 Na |  |
|          | 477.1702   | 4.5  | 9.4   | 19.5 | 215.3 | 6.871 | 0.10     | C31 H25 O5     |  |

Figure S11. HR-ESI-MS spectrum of **1**

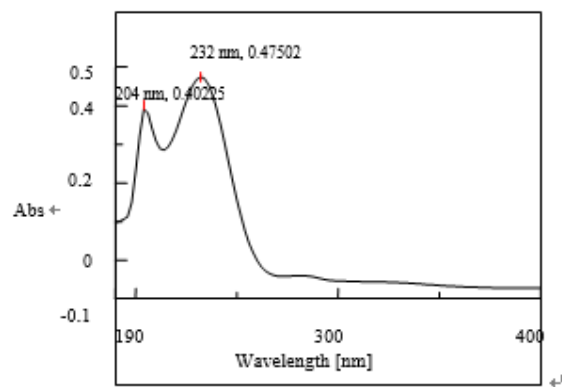

**Figure S12.** UV spectrum of **1** (in CH<sub>3</sub>OH)

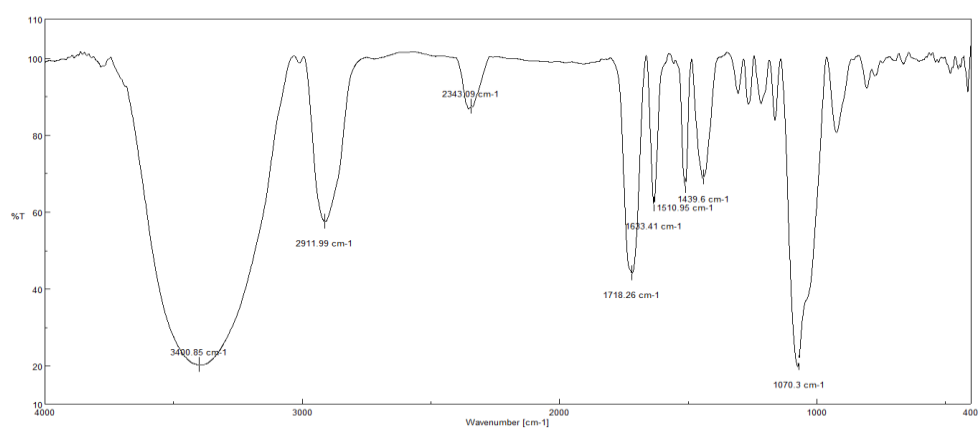

**Figure S13.** IR spectrum of **1** (in KBr)

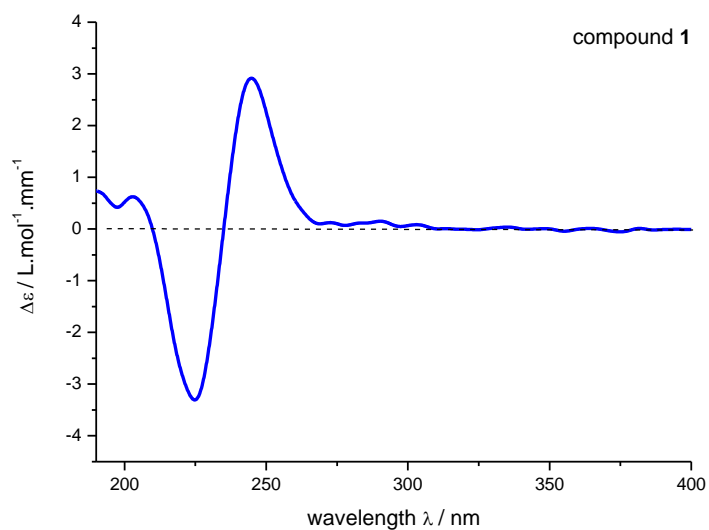

**Figure S14.** Experimental CD spectrum of **1** (in CH<sub>3</sub>OH)

4.2 Figure S15-S25. For Ionimacranalde B (2)

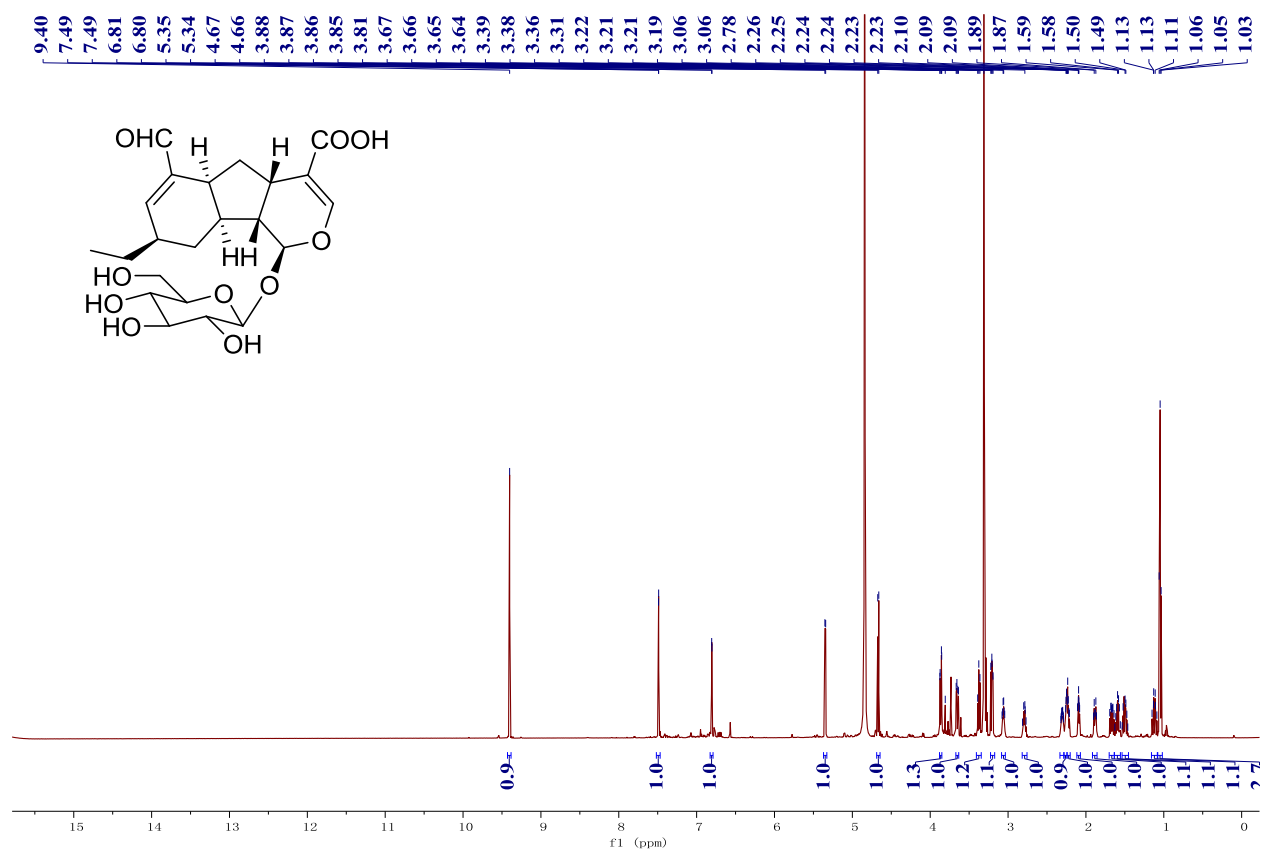

Figure S15. <sup>1</sup>H-NMR spectrum of 2 (600 MHz, in CD<sub>3</sub>OD)

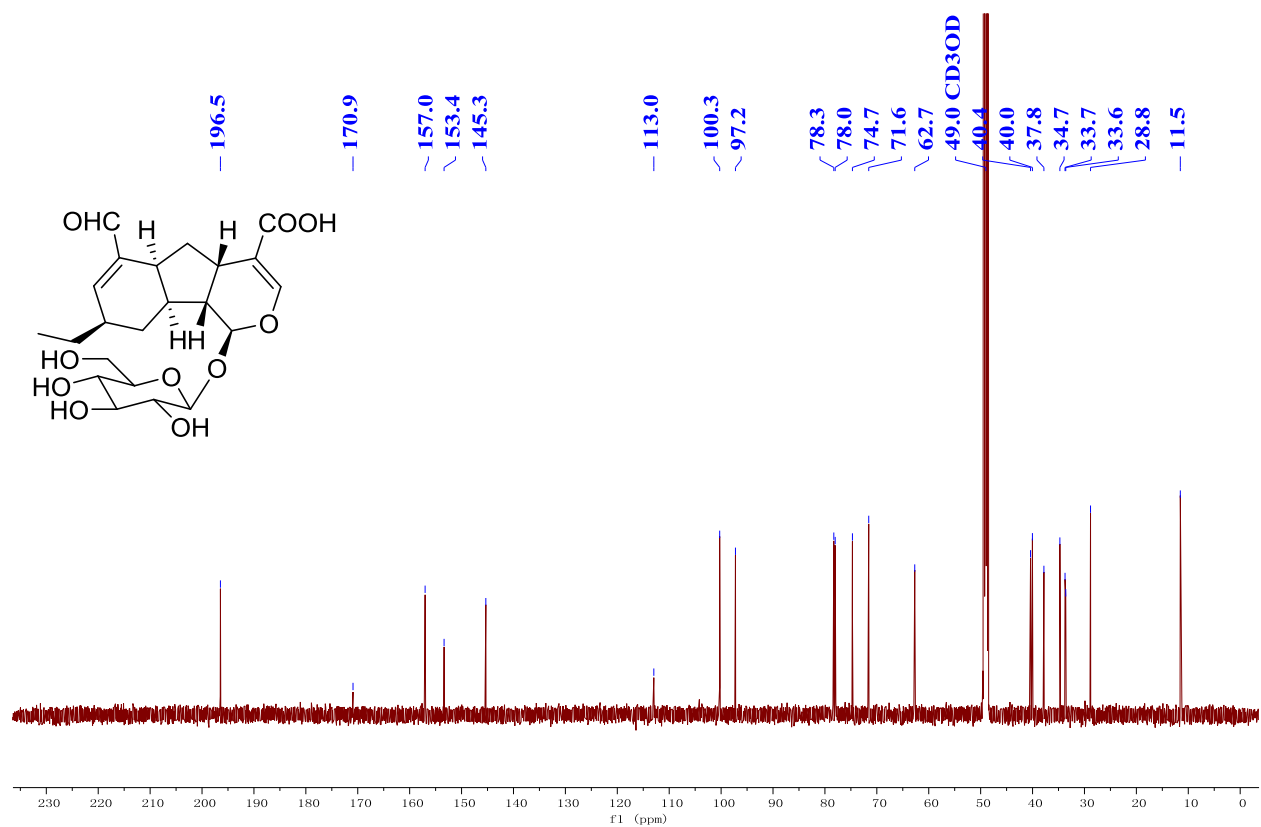

**Figure S16.**  $^{13}\text{C}$ -NMR spectrum of **2** (150 MHz, in  $\text{CD}_3\text{OD}$ )

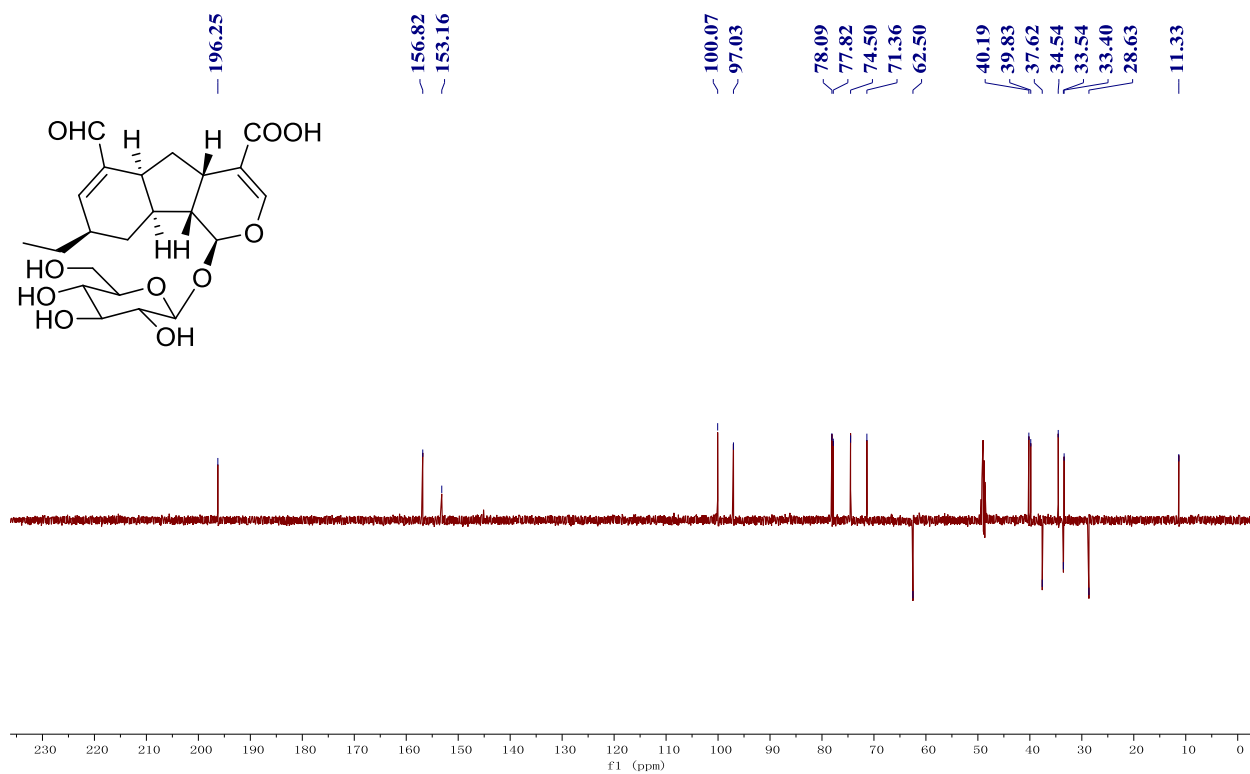

**Figure S17.** DEPT-135 spectrum of **2** (150 MHz, in  $\text{CD}_3\text{OD}$ )

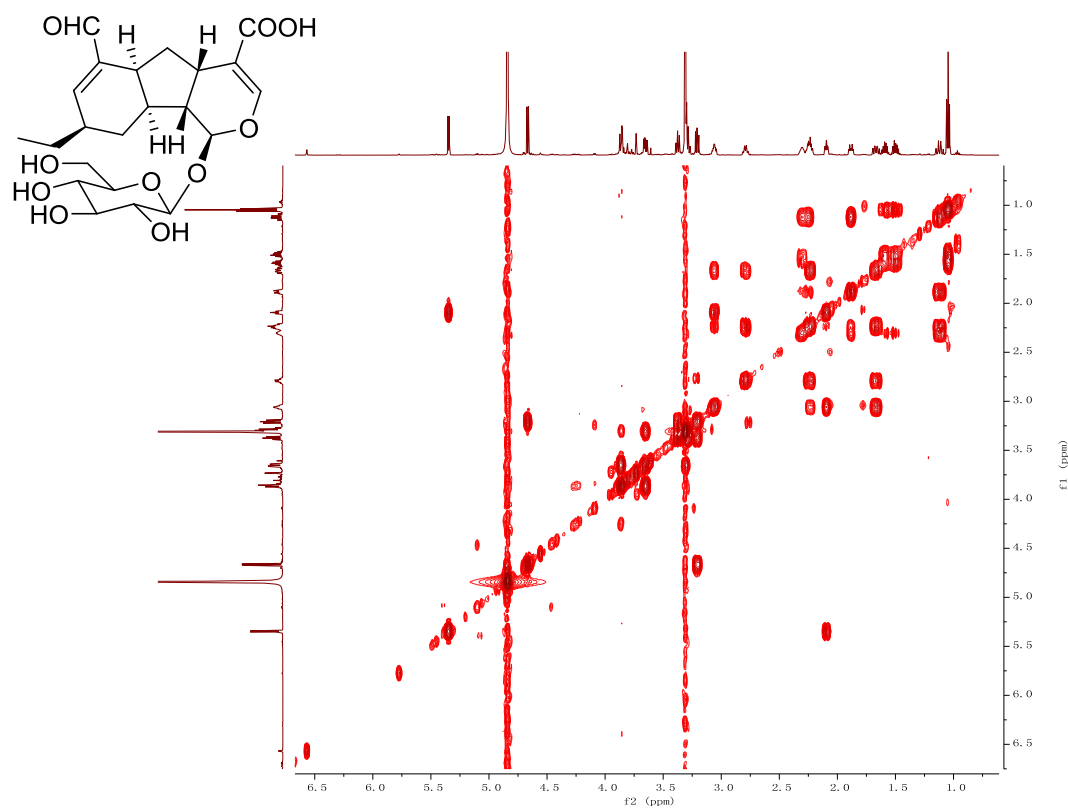

Figure S18.  $^1\text{H}$ - $^1\text{H}$  COSY spectrum of **2** (in  $\text{CD}_3\text{OD}$ )

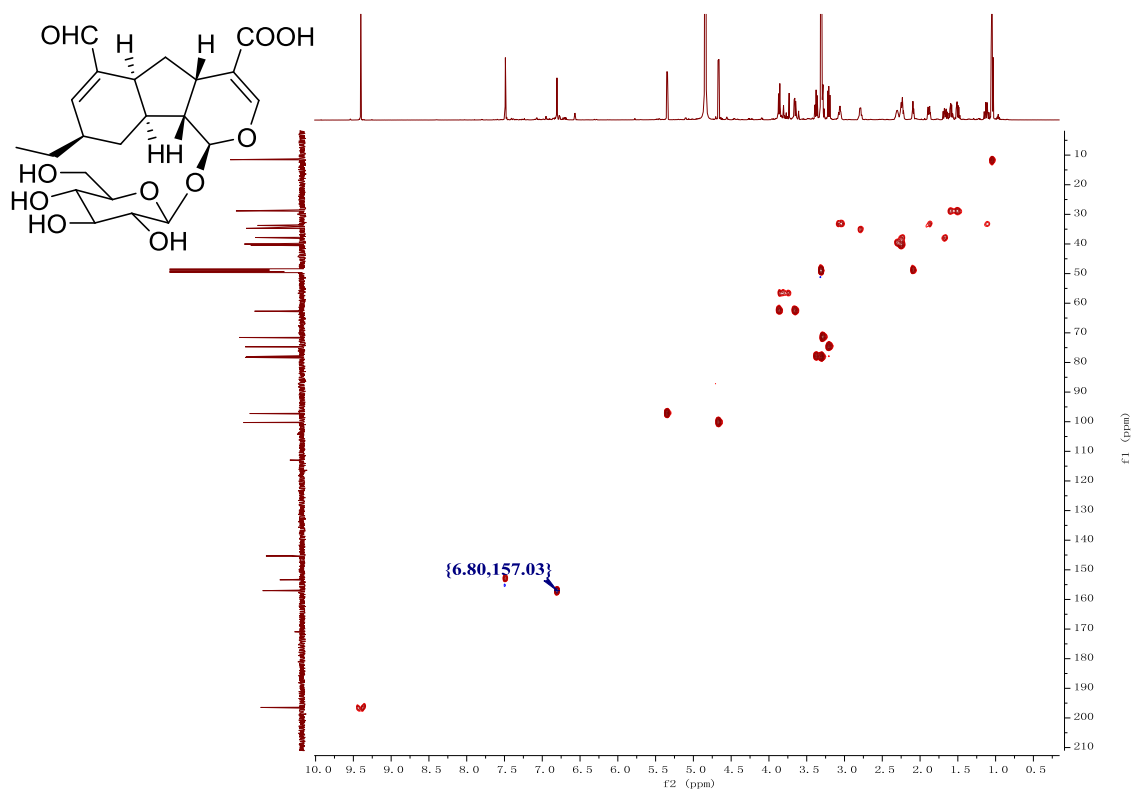

Figure S19. HSQC spectrum of **2** (in  $\text{CD}_3\text{OD}$ )

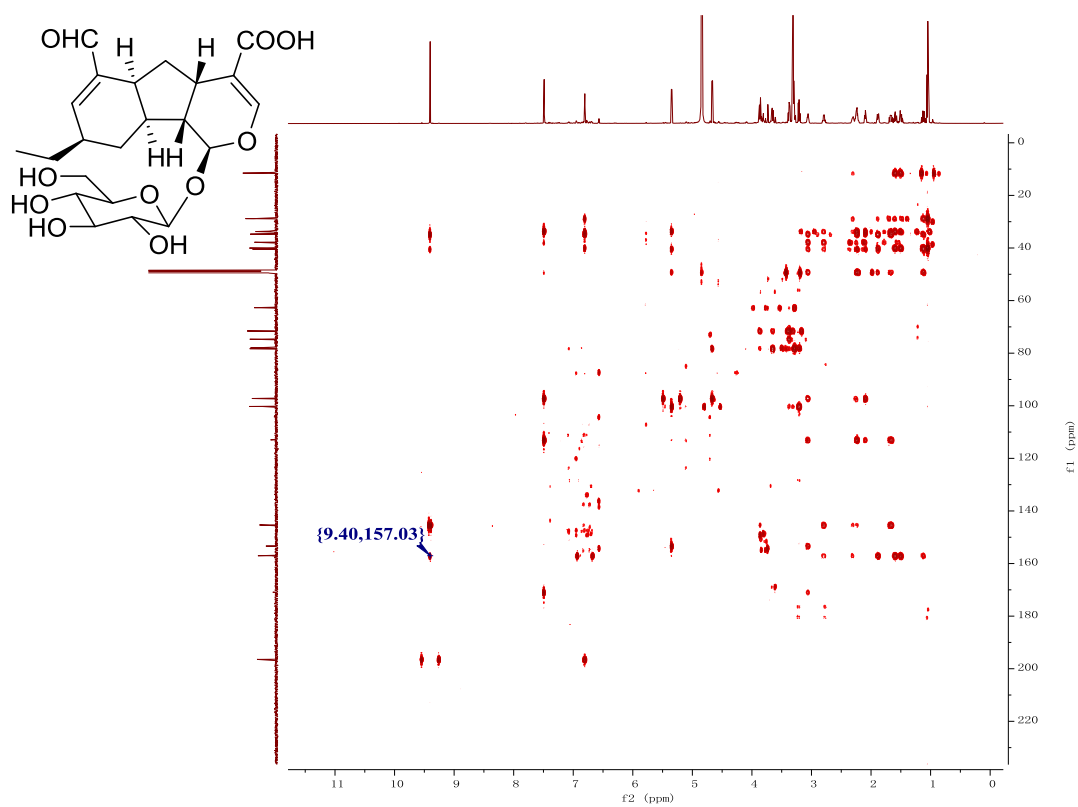

Figure S20. HMBC spectrum of **2** (in  $\text{CD}_3\text{OD}$ )

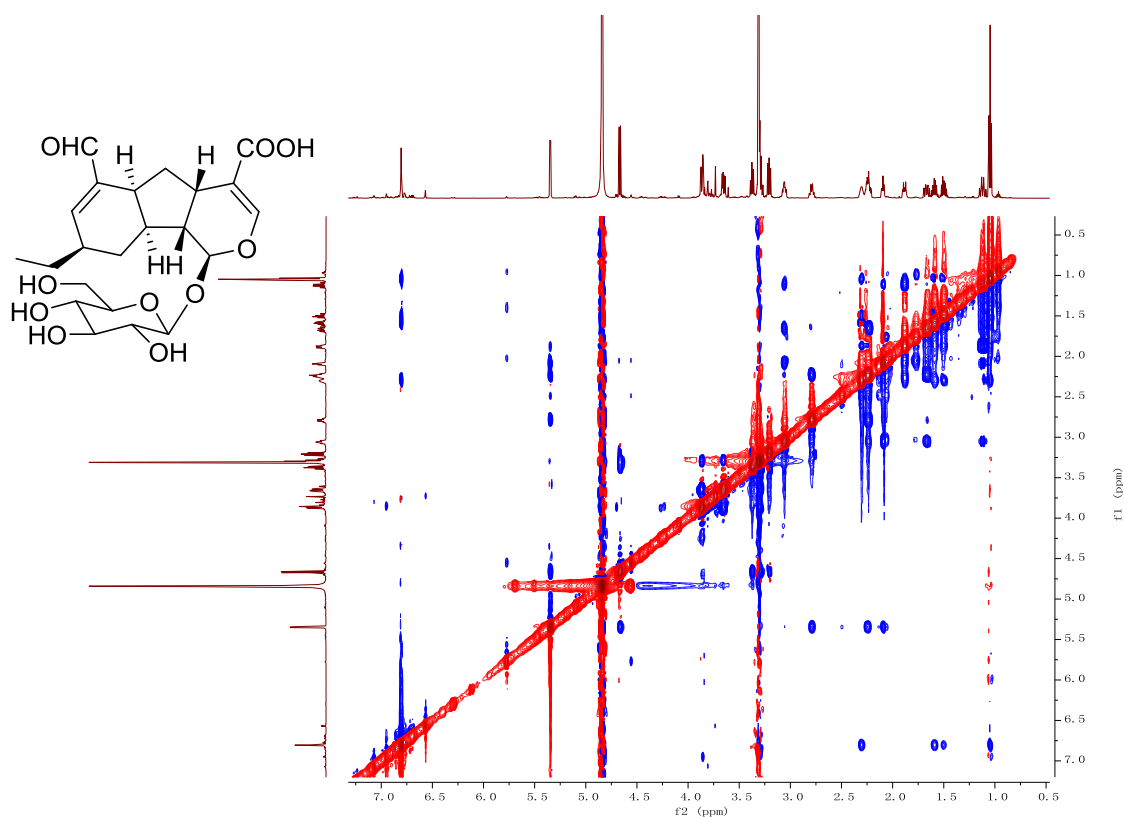

Figure S21. NOESY spectrum of **2** (in CD<sub>3</sub>OD)

Elemental Composition Report

Single Mass Analysis

Tolerance = 5.0 mDa / DBE: min = -1.5, max = 50.0

Element prediction: Off

Number of isotope peaks used for i-FIT = 3

Monoisotopic Mass, Even Electron Ions

217 formula(e) evaluated with 3 results within limits (up to 20 best isotopic matches for each mass)

Elements Used:

C: 0-100 H: 0-200 O: 0-100 Na: 0-1

LJ3-E6D2B

2016041106 46 (0.389)

1: TOF MS ES+  
4.05e+003

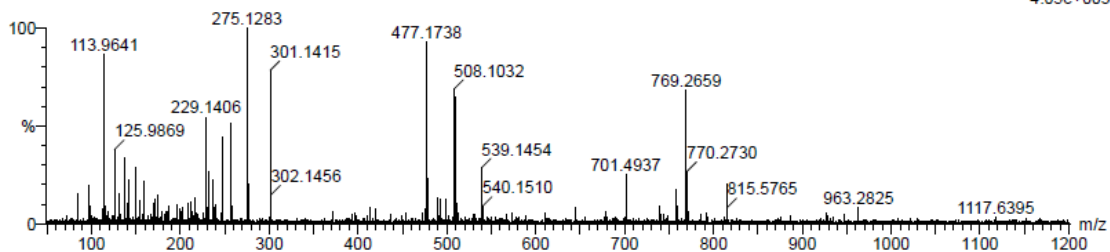

| Mass     | Calc. Mass | mDa  | PPM  | DBE  | i-FIT | Norm  | Conf (%) | Formula        |
|----------|------------|------|------|------|-------|-------|----------|----------------|
| 477.1738 | 477.1737   | 0.1  | 0.2  | 7.5  | 109.5 | 0.186 | 83.00    | C22 H30 O10 Na |
|          | 477.1761   | -2.3 | -4.8 | 10.5 | 111.1 | 1.812 | 16.34    | C24 H29 O10    |
|          | 477.1702   | 3.6  | 7.5  | 19.5 | 114.3 | 5.014 | 0.66     | C31 H25 O5     |

Figure S22. HR-ESI-MS spectrum of **2**

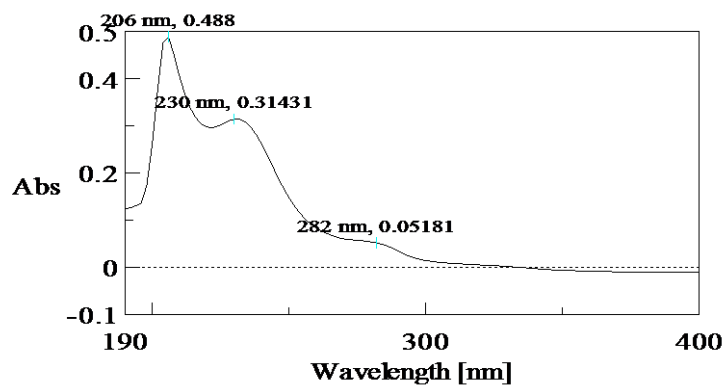

**Figure S23.** UV spectrum of **2** (in  $\text{CH}_3\text{OH}$ )

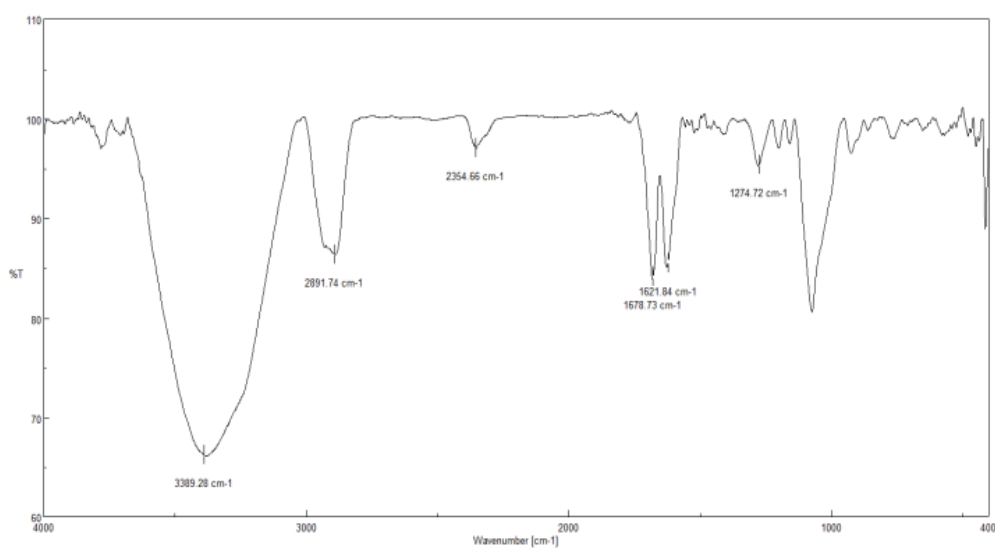

**Figure S24.** IR spectrum of **2** (in KBr)

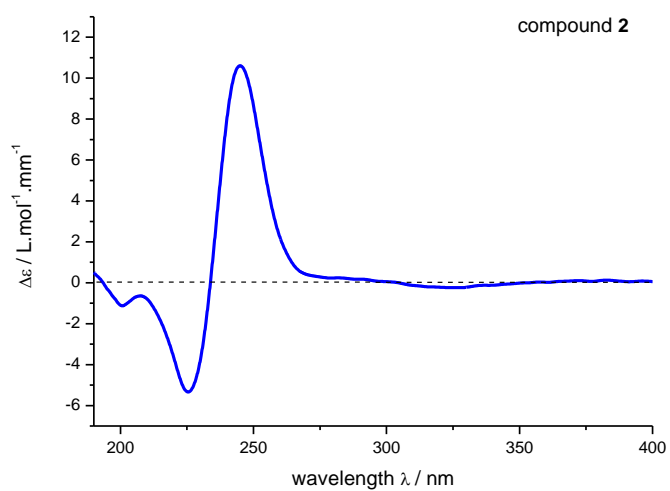

**Figure S25.** Experimental CD spectrum of **2** (in  $\text{CH}_3\text{OH}$ )



4.3 Figure S26-S36. For Ionimacranalde C (3)

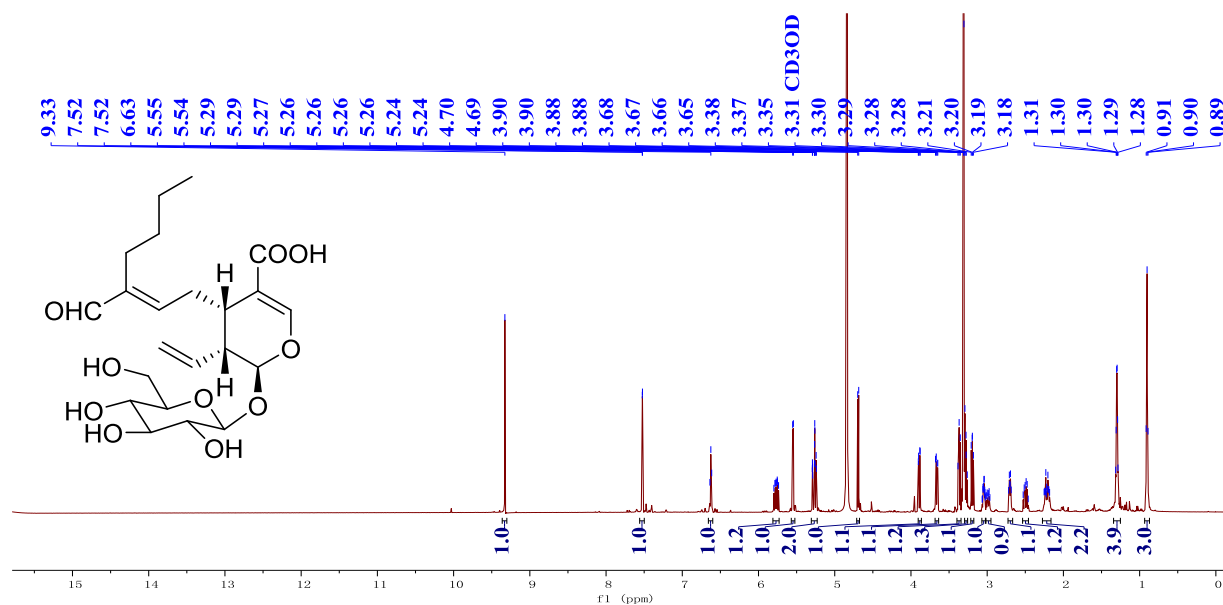

Figure S26.  $^1\text{H-NMR}$  spectrum of 3 (600 MHz, in  $\text{CD}_3\text{OD}$ )

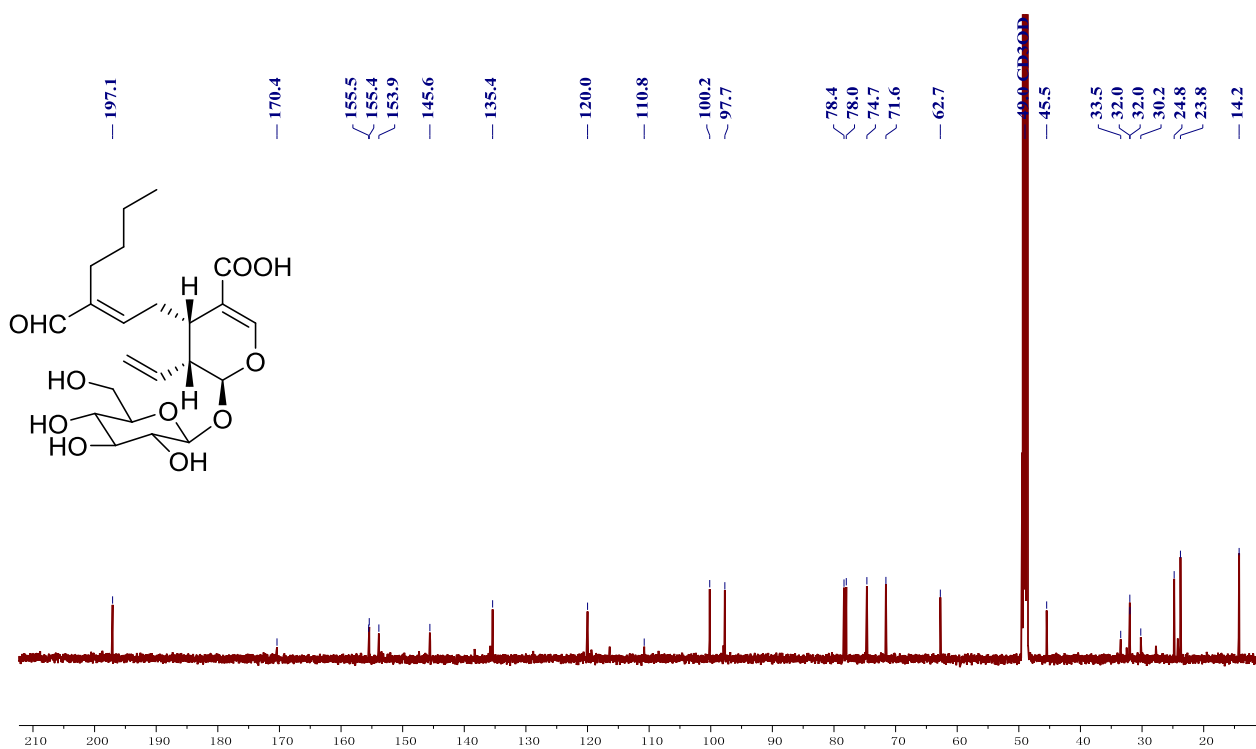

Figure S27.  $^{13}\text{C-NMR}$  spectrum of 3 (150 MHz, in  $\text{CD}_3\text{OD}$ )

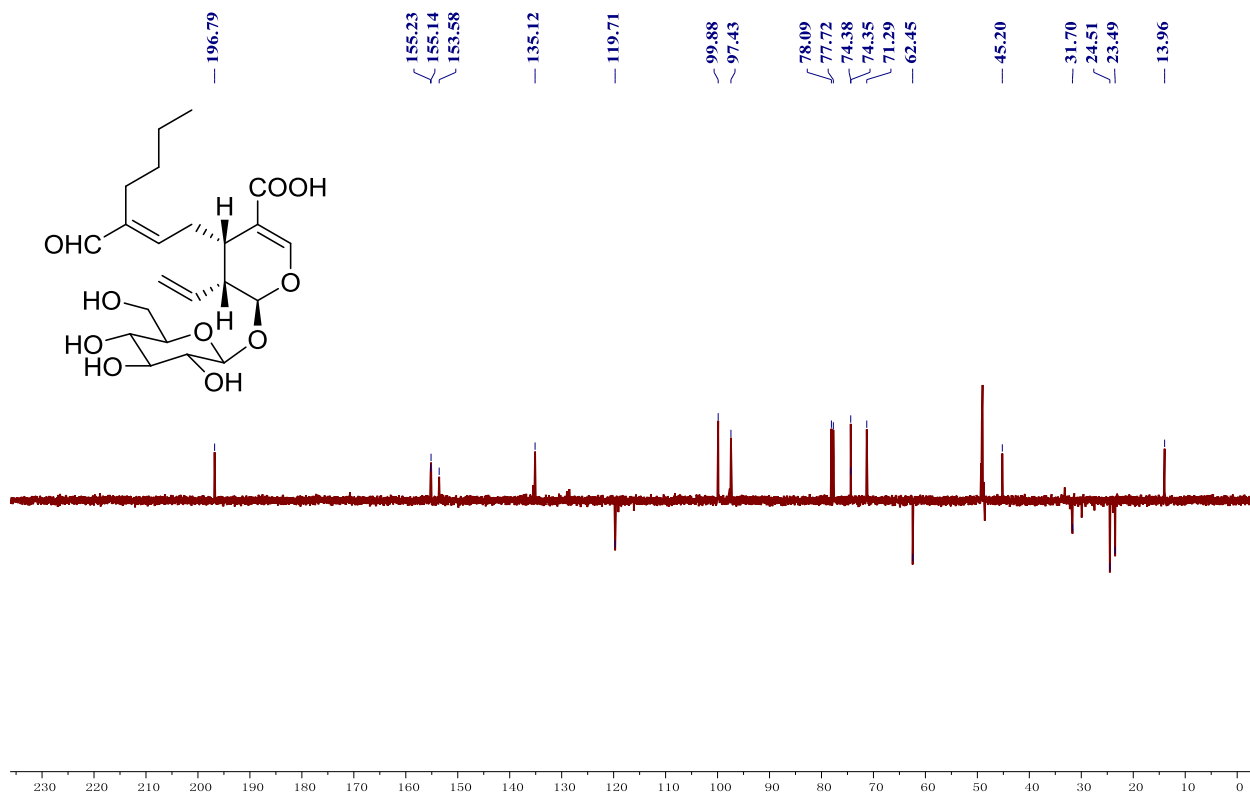

Figure S28. DEPT-135 spectrum of 3 (150 MHz, in CD<sub>3</sub>OD)

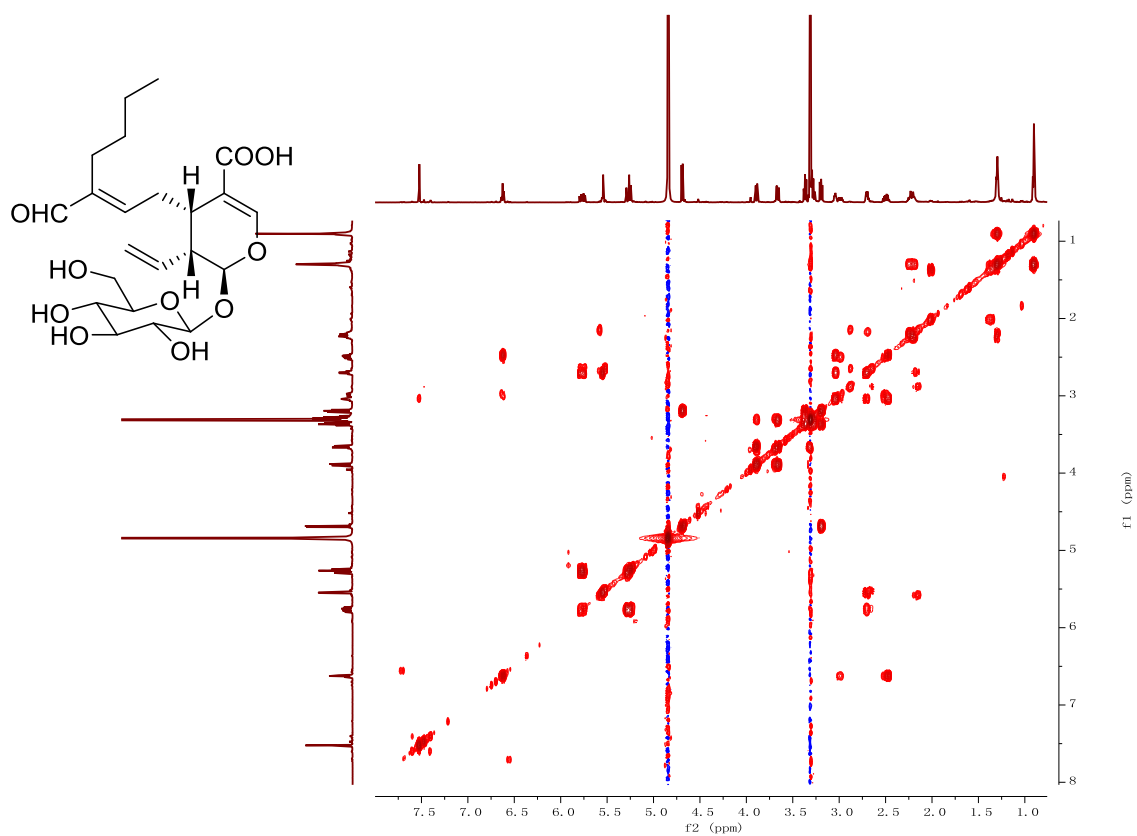

Figure S29. <sup>1</sup>H-<sup>1</sup>H COSY spectrum of 3 (in CD<sub>3</sub>OD)

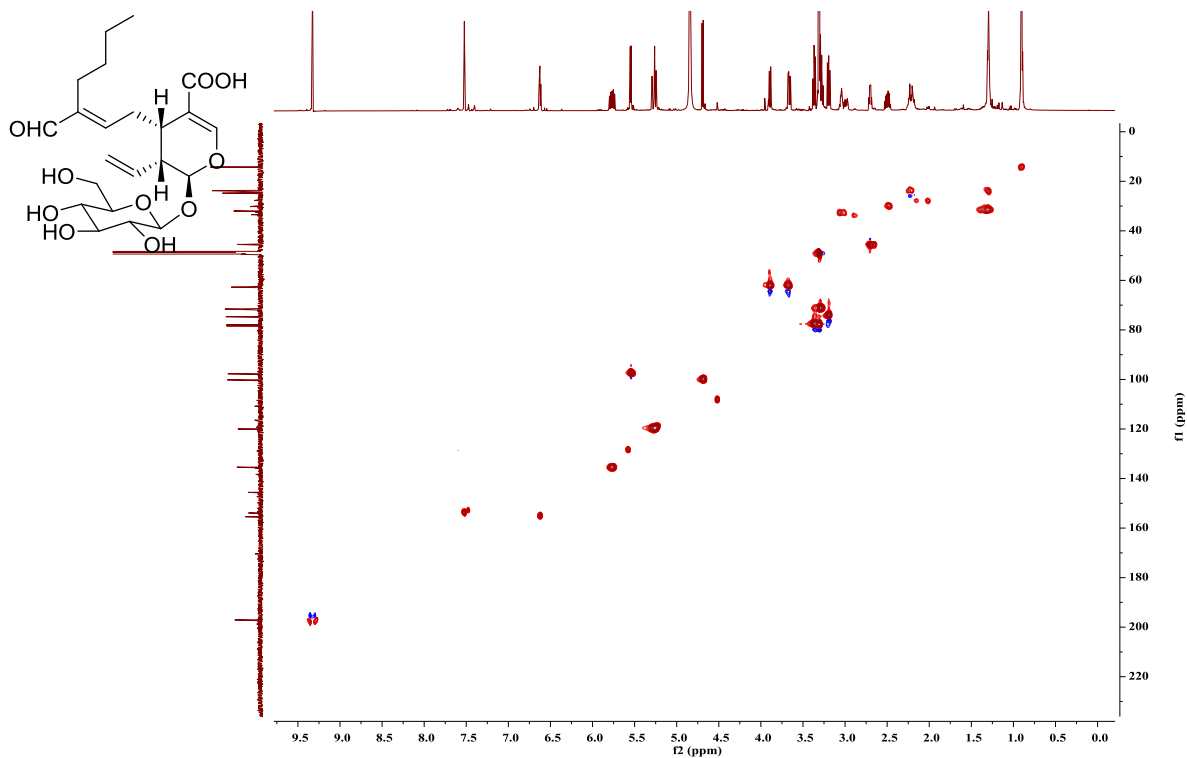

**Figure S30.** HSQC spectrum of **3** (in CD<sub>3</sub>OD)

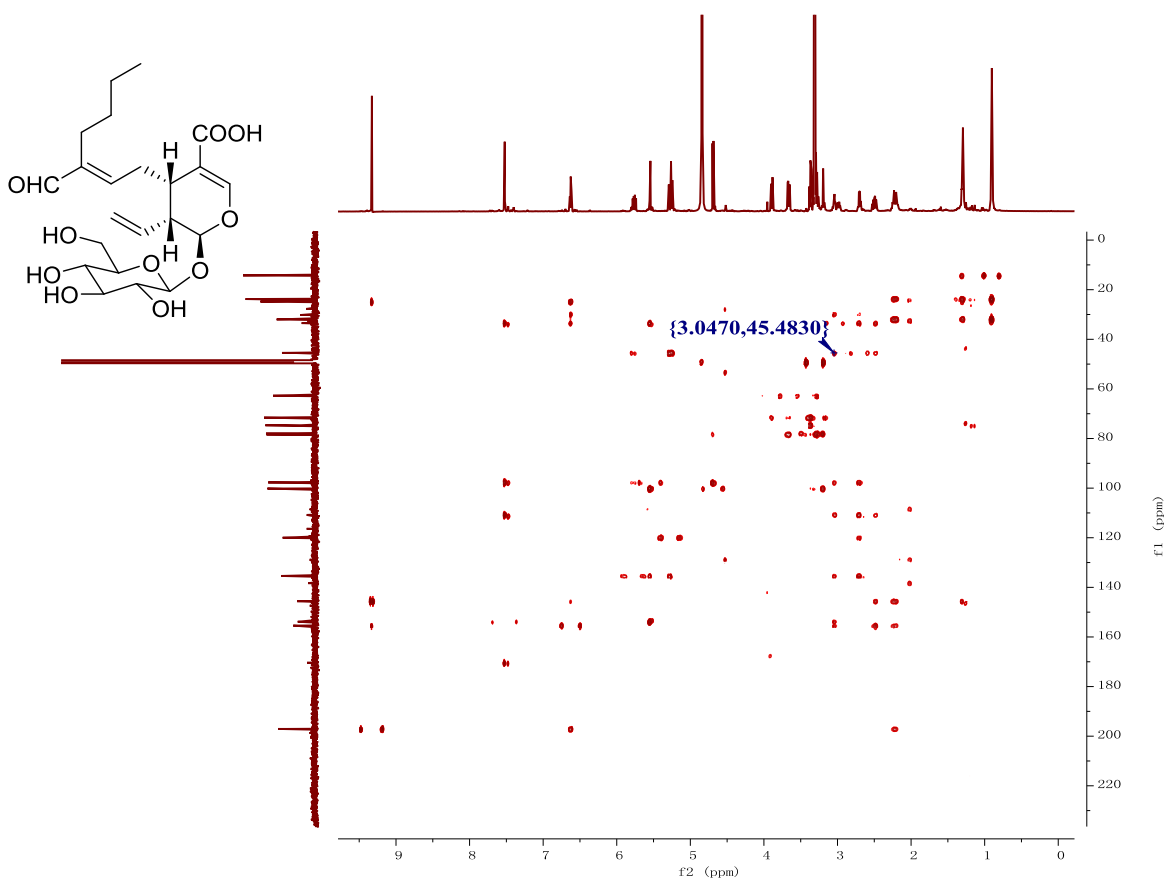

**Figure S31.** HMBC spectrum of **3** (in CD<sub>3</sub>OD)

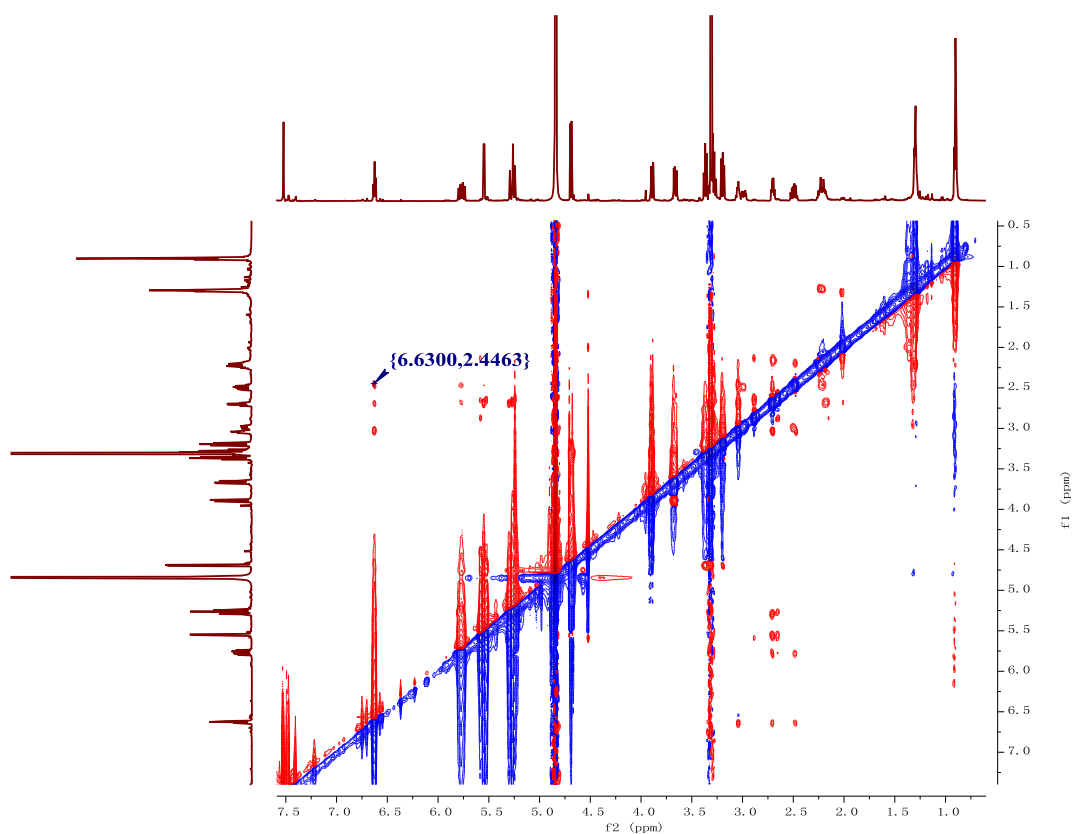

Figure S32. NOESY spectrum of **3** (in CD<sub>3</sub>OD)

Elemental Composition Report

Page 1

Single Mass Analysis

Tolerance = 5.0 mDa / DBE: min = -1.5, max = 50.0

Element prediction: Off

Number of isotope peaks used for i-FIT = 3

Monoisotopic Mass, Even Electron Ions

229 formula(e) evaluated with 3 results within limits (up to 20 best isotopic matches for each mass)

Elements Used:

C: 0-100 H: 0-200 O: 0-100 Na: 0-1

LJ3-E10A

2016041108 68 (0.565)

1: TOF MS ES+  
7.75e+003

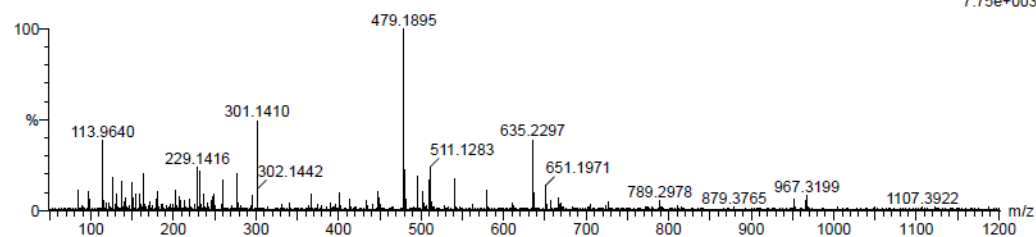

Minimum: -1.5  
Maximum: 5.0 10.0 50.0

| Mass     | Calc. Mass | mDa  | PPM  | DBE  | i-FIT | Norm  | Conf(%) | Formula        |
|----------|------------|------|------|------|-------|-------|---------|----------------|
| 479.1895 | 479.1893   | 0.2  | 0.4  | 6.5  | 114.8 | 0.144 | 86.59   | C22 H32 O10 Na |
|          | 479.1917   | -2.2 | -4.6 | 9.5  | 116.6 | 2.028 | 13.16   | C24 H31 O10    |
|          | 479.1858   | 3.7  | 7.7  | 18.5 | 120.6 | 5.979 | 0.25    | C31 H27 O5     |

Figure S33. HR-ESI-MS spectrum of **3**

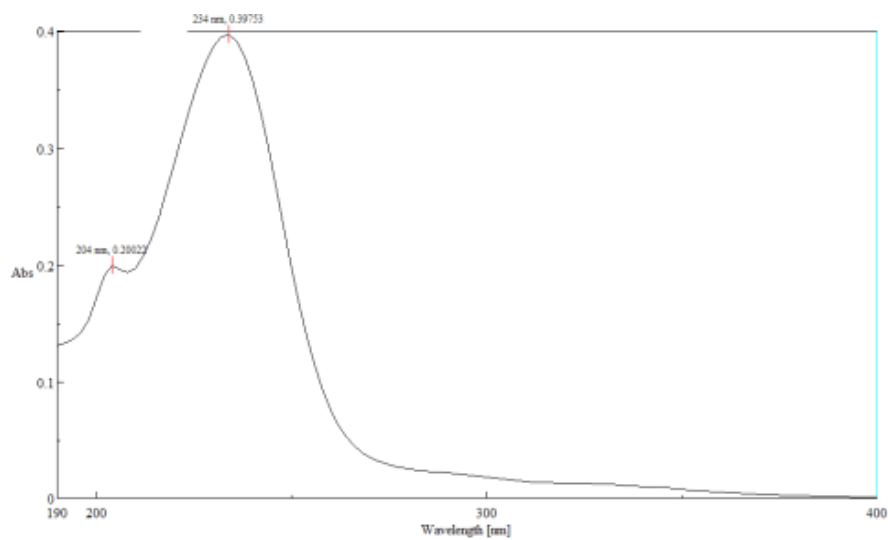

**Figure S34.** UV spectrum of **3** (in CH<sub>3</sub>OH)

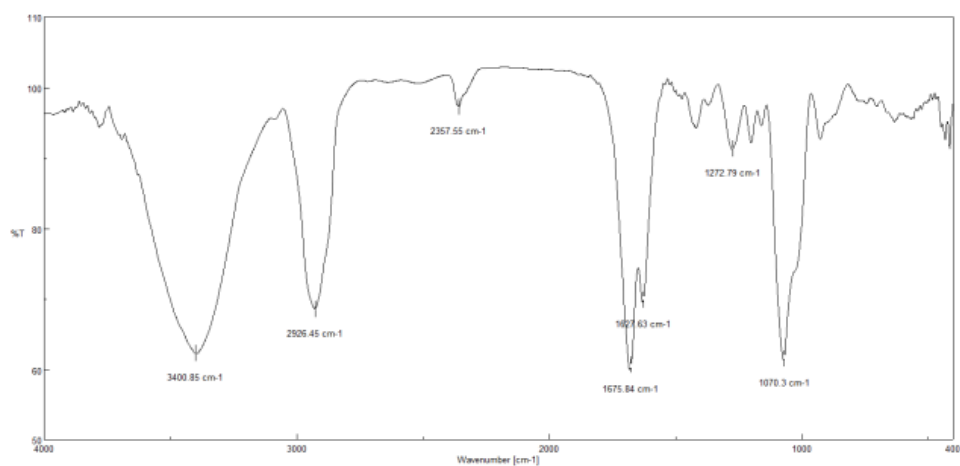

**Figure S35.** IR spectrum of **3** (in KBr)

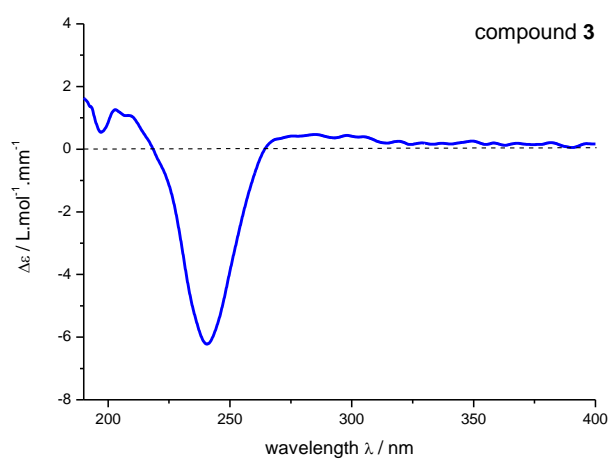

**Figure S36.** Experimental CD spectrum of **3** (in CH<sub>3</sub>OH)
